# Supplementary material for: Protonation state of F420H2 in the prodrug-activating deazaflavin dependent nitroreductase (Ddn) from Mycobacterium tuberculosis
Source: Royal Society of Chemistry journal article supplement (doi:10.1039/c6mb00033a), 2016-02-09
Supplement: c6mb00033a1.pdf [file c6mb00033a1.pdf]

Electronic Supplementary Information

**Protonation state of  $F_{420}H_2$  in the prodrug-activating deazaflavin dependent nitroreductase (Ddn) from *Mycobacterium tuberculosis***

A. Elaaf Mohamed,<sup>a</sup> F. Hafna Ahmed,<sup>a</sup> Sundaram Arulmozhiraja,<sup>a</sup> Ching Y. Lin,<sup>a</sup> Matthew C. Taylor,<sup>b</sup>  
Elmars R. Krausz,<sup>a</sup> Colin J. Jackson\*<sup>a</sup> and Michelle L. Coote\*<sup>a</sup>

<sup>a</sup>. Research School of Chemistry, The Australian National University, Canberra, ACT 2601, Australia.

<sup>b</sup>. CSIRO Land and Water, Black Mountain Laboratories, Canberra, ACT 2601, Australia.

Email: colin.jackson@anu.edu.au, michelle.coote@anu.edu.au

**Methods**

**Experimental Materials and Methods**

**Purification and reduction of  $F_{420}$ .**  $F_{420}$  was obtained from *M. smegmatis* 4517 cultures grown following the procedure in Bashiri et al.,<sup>1</sup> followed by extraction and purification as per the methods of Isabelle et al.<sup>2</sup> The enzymatic reduction of  $F_{420}$  to  $F_{420}H_2$  was carried out using  $F_{420}$ -dependent glucose-6-phosphate dehydrogenase (Fgd) purified as previously published.<sup>3</sup> Reactions were incubated for 15-30 min (until colourless) and typically contained 100-200  $\mu$ M  $F_{420}$ , 2.5 mM glucose-6-phosphate (G6P) (Sigma) and 1  $\mu$ M Fgd in 20 mM Tris pH 7.5. Fgd was then removed by centrifugation in a 1 mL 10 K MWCO spin filter (Millipore) and the  $F_{420}H_2$  eluted was used immediately to minimise air oxidation.

**Purification of Ddn and MSMEG\_2027.** MBP-tagged Ddn was expressed and purified similar to previous methods by Singh et al.<sup>4</sup> Briefly, the codon optimised gene for Ddn (Invitrogen) was cloned into the expression vector pMALc2X using the EcoRI and PstI restriction sites (Fermentas). The construct was transformed into the *Escherichia coli* strain BL21DE3 (Invitrogen) and a 5 mL starter culture was grown over night at 30 °C in LB media containing 100  $\mu$ g/mL ampicillin (Astral) and 1% glucose. This was transferred to 1 L of LB media containing 100  $\mu$ g/mL ampicillin that was initially grown at 37 °C until the optical density at 600 nm reached about 0.5. The culture was then induced with 0.4 mM IPTG (Astral), after which it was further incubated at room temperature for an additional 3 hr. Cells were harvested by centrifugation at 5000  $\times$  g for 15 min at 4 °C and resuspended in 30 mL of lysis buffer (20 mM Tris, 200 mM NaCl, 1 mM EDTA, 1 mM DTT, pH 7.4). The cell suspension was lysed by sonication using an Omni Sonicator Ruptor 400 (3  $\times$  3 min at 60% power) and the soluble fraction was separated by further centrifugation at 13000  $\times$  g for 1 hr at 4 °C. The lysate was passed through 1.5 mL amylose resin (New England Biolabs) in a gravity column and washed with a further 30 mL of lysis buffer. Finally the MBP-tagged Ddn was eluted with elution buffer (20 mM Tris, 200 mM NaCl, 1 mM EDTA, 1 mM DTT, 10 mM maltose, 10% glycerol, pH 7.4), flash frozen and stored at -20 °C.

MSMEG\_2027 was expressed and purified exactly as described in Ahmed et al [ref], where the His-tag used for the purification of the full-length protein by nickel affinity chromatography was removed, and the protein was stored in 50 mM Tris, 150 mM NaCl, pH 7.5 at 4 °C.

**UV-visible spectroscopy.** The UV-visible spectra of the samples were obtained using a Molecular Devices SpectraMax M2 Multi-mode Microplate reader and an Agilent Cary 60 UV-vis spectrophotometer. Initially, aliquots of 20 mM Tris were adjusted to the desired pH. After the addition of  $F_{420}$ ,  $F_{420}H_2$  or enzyme to the buffer, the pH of the solutions were checked again and adjusted if required before obtaining the final spectra. The enzymes were added in 2  $\times$  excess compared to the cofactor to maximise the presence of enzyme associated  $F_{420}H_2$ . Experiments were repeated to ensure reproducibility.

## Computational Methods

For computational purposes a truncated version of the cofactor was used where the R group as seen in **Fig. 1** have been substituted for a methyl group with the chemically active chromophore kept intact. Simulated UV-Vis spectra were calculated using time-dependent density functional theory (TD-DFT) utilising the dispersion-corrected density functional,  $\omega$ B97XD, with the 6-311+g(2d,p) basis set.<sup>5</sup> Solvation effects in both water and the low polarity solvent toluene were taken into account using the density based solvation model (SMD).<sup>6</sup> The calculations conducted in water allowed for a comparison with the aqueous experimental spectra meanwhile the low polarity solvent toluene provides a more accurate comparison with that of the enzyme active site environment. For this latter calculation the dielectric constant was adjusted to  $\epsilon = 12$  so as to better mimic the polarity within the enzyme active site. All calculations were performed using the GAUSSIAN09 suite of programs.<sup>7</sup>

## References

1. G. Bashiri, A. M. Rehan, D. R. Greenwood, J. M. Dickson and E. N. Baker, *PloS one*, 2010, **5**, e15803.
2. D. Isabelle, D. R. Simpson and L. Daniels, *Appl. Environ. Microbiol.*, 2002, **68**, 5750-5755.
3. G. Bashiri, C. J. Squire, N. J. Moreland and E. N. Baker, *J. Biol. Chem.*, 2008, **283**, 17531-17541.
4. R. Singh, U. Manjunatha, H. I. Boshoff, Y. H. Ha, P. Niyomrattanakit, R. Ledwidge, C. S. Dowd, I. Y. Lee, P. Kim, L. Zhang, S. Kang, T. H. Keller, J. Jiricek and C. E. Barry, 3rd, *Science*, 2008, **322**, 1392-1395.
5. J.-D. Chai and M. Head-Gordon, *Phys. Chem. Chem. Phys.*, 2008, **10**, 6615-6620.
6. A. V. Marenich, C. J. Cramer and D. G. Truhlar, *J. Phys. Chem. B*, 2009, **113**, 6378-6396.
7. M. J. Frisch, *et al.*, *GAUSSIAN 09, Rev D.01*, Gaussian Inc., Wallingford CT, 2009.

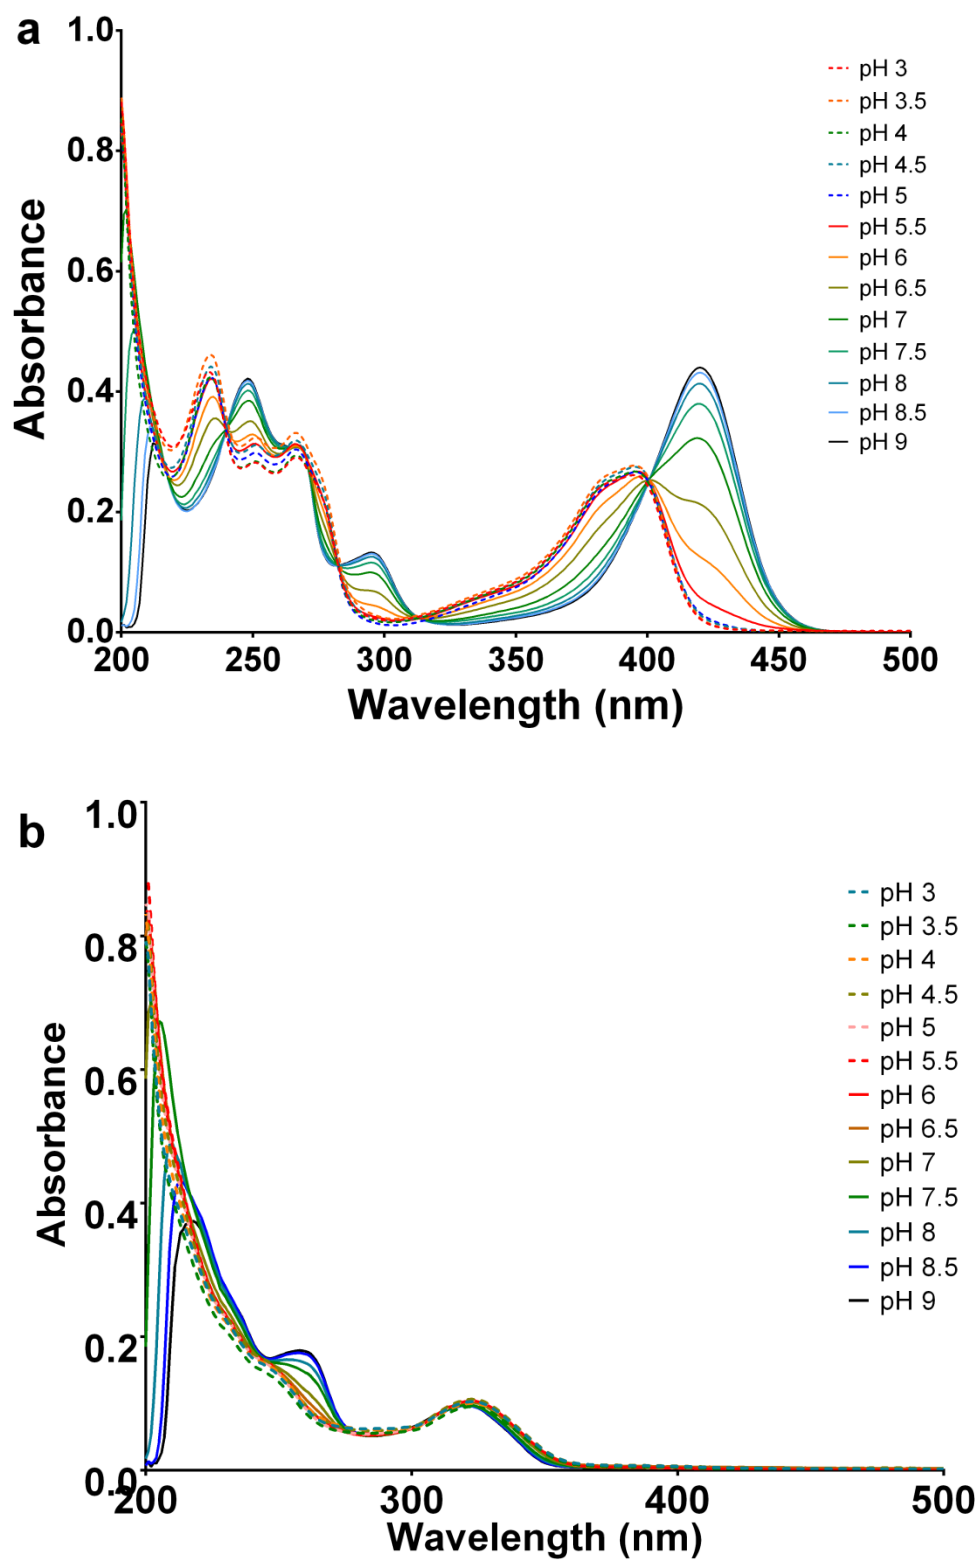

**Figure S1.** Full absorbance spectra of  $F_{420}$  (a) and  $F_{420}H_2$  (b) from 200 to 500 nm for the pH range 3 to 9.

**Table S1.** Summary table of calculated vertical excitation energies for absorbance with the excited states and orbitals involved in the transition assigned. The values are compared with the experimental data in aqueous presented in bold.

| Cofactor Species                                             | Transition                | Solution Phase (Low Polarity $\epsilon = 12$ ) |        |                 | Solution Phase (Aqueous) |        |                 |
|--------------------------------------------------------------|---------------------------|------------------------------------------------|--------|-----------------|--------------------------|--------|-----------------|
|                                                              |                           | <i>f</i>                                       | $\mu$  | $\Delta E$ (nm) | <i>f</i>                 | $\mu$  | $\Delta E$ (nm) |
| <b>F<sub>420</sub></b>                                       | Main absorbance peak      | 0.6258                                         | 6.9215 | 335.99          | 0.5773                   | 6.3101 | 332.03          |
|                                                              | Excited State 1: 63 → 64  |                                                |        |                 |                          |        |                 |
|                                                              | <b>Experimental</b>       | -                                              | -      | -               | -                        | -      | <b>400</b>      |
| <b>F<sub>420</sub></b><br><b>(Deprotonated)</b>              | Main absorbance peak      | 0.8197                                         | 9.9844 | 370.00          | 0.7523                   | 8.9864 | 362.84          |
|                                                              | Excited State 1: 63 → 64  |                                                |        |                 |                          |        |                 |
|                                                              | <b>Experimental</b>       | -                                              | -      | -               | -                        | -      | <b>420</b>      |
| <b>F<sub>420</sub>H<sub>2</sub></b>                          | Main absorbance peak      | 0.2947                                         | 2.8501 | 293.74          | 0.2889                   | 2.7275 | 286.79          |
|                                                              | Excited State 1: 64 → 65  |                                                |        |                 |                          |        |                 |
|                                                              | <b>Experimental</b>       | -                                              | -      | -               | -                        | -      | <b>322</b>      |
| <b>F<sub>420</sub>H<sub>2</sub></b>                          | Secondary absorbance peak | 0.2414                                         | 1.7857 | 224.73          | 0.1775                   | 1.3035 | 223.13          |
|                                                              | Excited State 3: 62 → 65* |                                                |        |                 |                          |        |                 |
|                                                              | <b>Experimental</b>       | -                                              | -      | -               | -                        | -      | <b>245</b>      |
| <b>F<sub>420</sub>H<sup>-</sup></b><br><b>(Deprotonated)</b> | Main absorbance peak      | 0.2359                                         | 0.7791 | 287.31          | 0.2252                   | 2.0687 | 278.98          |
|                                                              | Excited State 1: 64 → 65  |                                                |        |                 |                          |        |                 |
|                                                              | <b>Experimental</b>       | -                                              | -      | -               | -                        | -      | <b>320</b>      |
| <b>F<sub>420</sub>H<sup>-</sup></b><br><b>(Deprotonated)</b> | Secondary absorbance peak | 0.2960                                         | 2.3341 | 239.53          | 0.2993                   | 2.3188 | 235.31          |
|                                                              | Excited State 3: 63 → 65* |                                                |        |                 |                          |        |                 |
|                                                              | <b>Experimental</b>       | -                                              | -      | -               | -                        | -      | <b>260</b>      |

\*The absorbance transition is the result of a combination of multiple orbital transitions. The orbital transition listed here are the strongest contributors for each absorbance transition.



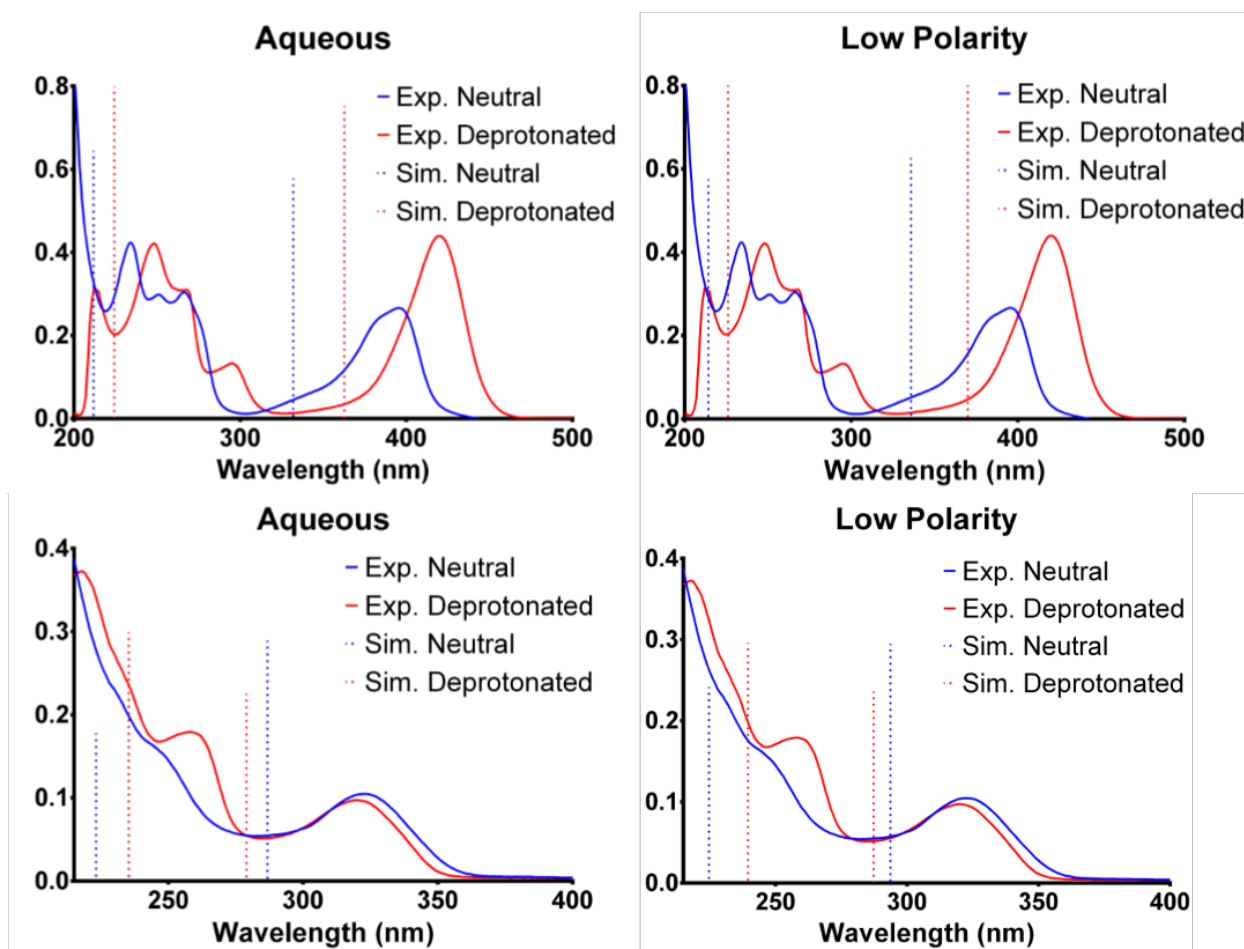

**Figure S2.** The calculated electronic transitions overlaid with experimental results (solid lines) for  $F_{420}$  (top) and  $F_{420}H_2$  (bottom). The experimental results are those for pH 5 and pH 9 for neutral and deprotonated respectively. The electronic transitions (dashed lines) were calculated using  $\omega B97XD/6-311+G(2d,p)$  level of theory in GAUSSIAN09. The absolute values of the calculated transitions are blue-shifted however the trends and relative shifts between the transitions emulate the experimental results with strong agreement.

**Table S2.** Assignments and visualization of the important electronic transitions and the orbitals involved for both protonated and deprotonated F<sub>420</sub>. The results are shown for calculations done using  $\omega$ B97XD/6-311+G(2d,p) under aqueous solvent conditions using the SMD solvent model.

| Cofactor Species                   | Assignment                                    | $\Delta E(\text{nm})$ | $f$    | From                                                                               | To                                                                                  |
|------------------------------------|-----------------------------------------------|-----------------------|--------|------------------------------------------------------------------------------------|-------------------------------------------------------------------------------------|
| F <sub>420</sub>                   | Excited State 1<br>$^1A(63) \rightarrow (64)$ | 332.03                | 0.5773 | 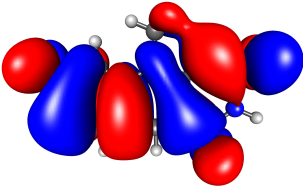 |  |
| F <sub>420</sub><br>(Deprotonated) | Excited State 1<br>$^1A(63) \rightarrow (64)$ | 362.84                | 0.7523 |  |  |

**Table S3.** Assignments and visualization of the important electronic transitions and the orbitals involved for both protonated and deprotonated  $F_{420}H_2$ . The results are shown for calculations done using  $\omega B97XD/6-311+G(2d,p)$  under aqueous solvent conditions using the SMD solvent model.

| Cofactor Species               | Assignment                                    | $\Delta E(\text{nm})$ | $f$    | From                                                                                | To                                                                                   |
|--------------------------------|-----------------------------------------------|-----------------------|--------|-------------------------------------------------------------------------------------|--------------------------------------------------------------------------------------|
| $F_{420}H_2$                   | Excited State 1<br>$^1A(64) \rightarrow (65)$ | 286.79                | 0.2889 | 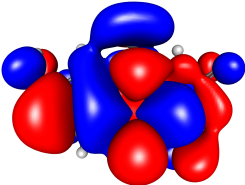  |   |
|                                | Excited State 3<br>$^1A(62) \rightarrow (65)$ | 223.13                | 0.1775 |   |   |
| $F_{420}H^-$<br>(Deprotonated) | Excited State 1<br>$^1A(64) \rightarrow (65)$ | 278.98                | 0.2252 |   |   |
|                                | Excited State 3<br>$^1A(63) \rightarrow (65)$ | 235.31                | 0.2993 |  |  |

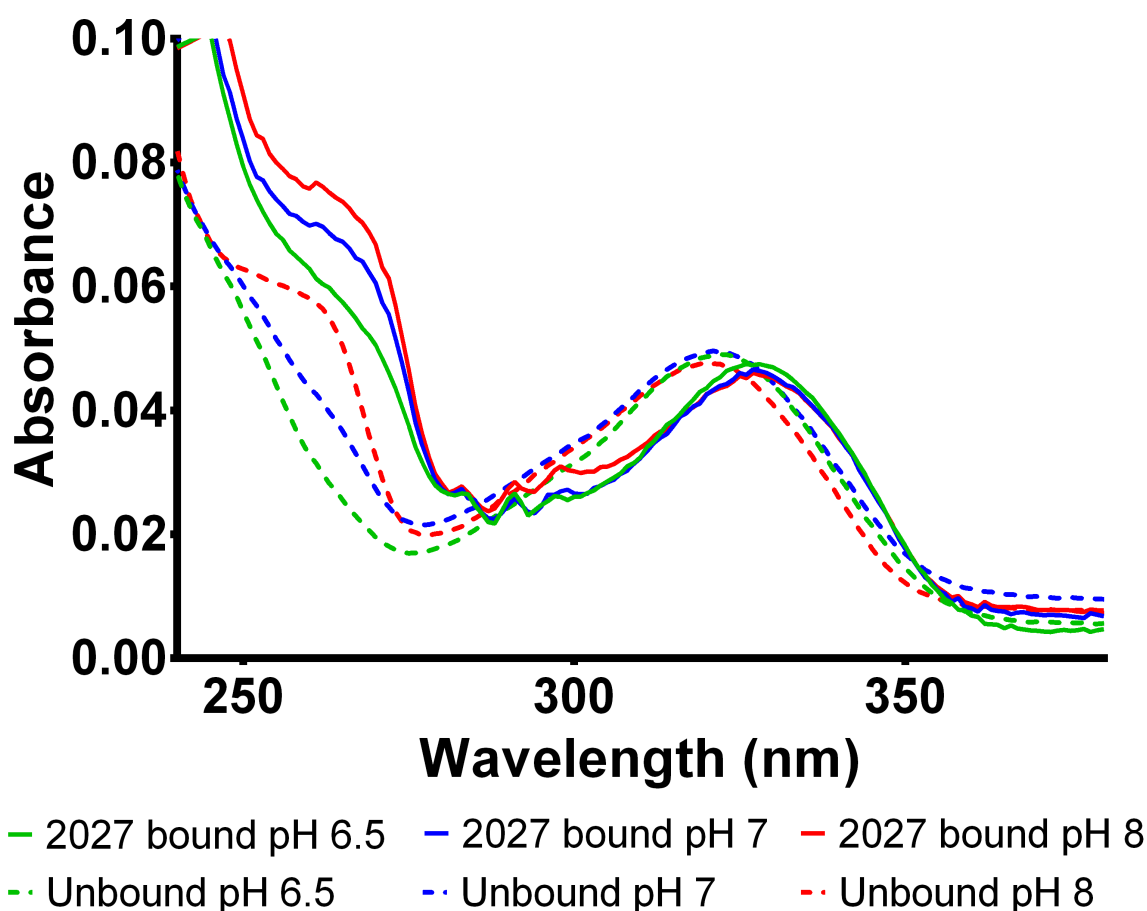

**Fig S4.** Comparison of the absorbance spectrum for  $F_{420}H_2$  when bound to 2027 at three different pH values with their unbound counterparts. The same 5 – 10 nm red shift of all spectroscopic features observed in the Ddn bound spectrum (Fig. 5) is observed here as well. The spectrum of MSMEG\_2027 itself is less noisy and clearer due to the lack of the Maltose Binding Protein (MBP) tag that was present in the Ddn sample for protein solubilisation. The 260 nm peak is distinctly present at all three pH values in the bound species whereas the unbound species rapidly loses the feature at pH 7.

## Computational Geometries and Data

### F<sub>420</sub> Aqueous Optimisation

```
1\1\GINC-R175\FOpt\RM06L\6-311+G(2d,p)\C12H9N3O3\ROOT\04-Dec-2014\0\#\#  
M06L/6-311+g(2d,p) OPT SCRF=(SMD,Solvent=Water,Read) maxdisk=214748364  
8\F1solv.m06l\0,1\C,-3.4271941664,2.0774041477,0.000629506\C,-2.1825  
864663,2.686860098,0.0009960634\C,-1.0261871144,1.9045869041,0.0013439  
516\C,-1.1567098017,0.4852144001,0.0013128575\C,-2.4450827441,-0.09216  
00892,0.0009331205\C,-3.5701069854,0.678828827,0.0005946172\N,0.246792  
5253,2.4567628615,0.0017192508\C,1.383449692,1.6801549943,0.0020612414  
\C,1.2360917321,0.2644774497,0.0020251244\C,-0.0064885033,-0.307300330  
8,0.0016589652\N,2.5451991647,2.3190419915,0.0024030163\C,3.6824258783  
,1.5829186792,0.0027449567\N,3.5990050922,0.1880522284,0.0027277272\C,  
2.4437367404,-0.5469836326,0.0023883995\C,0.4570093909,3.9052103224,0.  
00177387\O,4.8079138542,2.0936093346,0.0030766506\O,2.461664333,-1.777  
9044148,0.002400399\O,-4.5708250294,2.7972274611,0.0002857507\H,-2.152  
6681214,3.767233092,0.0009990983\H,-2.515862911,-1.1744456396,0.000917  
953\H,-4.5632954724,0.2462432398,0.0003018155\H,-0.1014534936,-1.38890  
20905,0.0016366071\H,4.4767312841,-0.3194182968,0.0029913123\H,-0.4877  
109915,4.4300125134,0.0014902822\H,1.023519602,4.1929984535,-0.8818236  
949\H,1.0229943444,4.1930080341,0.8857048593\H,-4.3618385209,3.7417374  
238,0.0003427358\Version=ES64L-G09RevD.01\State=1-A'\HF=-852.8550661\  
RMSD=4.416e-09\RMSF=1.312e-05\Dipole=-5.4311749,1.5751889,-0.0016225\Q  
uadrupole=-14.7035694,8.8399771,5.8635923,-10.9839736,-0.0060524,-0.00  
32802\PG=CS [SG(C12H7N3O3),X(H2)]\@
```

### F<sub>420</sub> Low Polarity Optimisation

```
1\1\GINC-R95\FOpt\RM06L\6-311+G(2d,p)\C12H9N3O3\ROOT\18-Mar-2015\0\#\#M  
06L/6-311+g(2d,p) OPT SCRF=(SMD,Solvent=Ethanol,Read) maxdisk=16106127  
36\F1solv.m06l\0,1\C,-3.430725203,2.0790876763,0.0006284475\C,-2.184  
6638596,2.6873566642,0.0009954434\C,-1.0269918386,1.9050738331,0.00134  
37098\C,-1.1579765357,0.485603653,0.001312479\C,-2.4463285993,-0.09012  
13733,0.0009327392\C,-3.5720558958,0.6807489162,0.0005940277\N,0.24522  
66253,2.4566959571,0.0017187858\C,1.383068234,1.678985021,0.0020611344  
\C,1.2352720169,0.261505819,0.0020248969\C,-0.0061342671,-0.3085221793  
,0.0016590771\N,2.5401125839,2.3179997219,0.0024015104\C,3.6852471534,  
1.5878803388,0.0027457682\N,3.599404395,0.1900445688,0.002727835\C,2.4  
467397475,-0.5506266735,0.0023893116\C,0.461810855,3.9028980659,0.0017  
753094\O,4.8039721044,2.099037151,0.0030754498\O,2.4638117372,-1.77809  
57181,0.0024010382\O,-4.5728458682,2.7925928902,0.0002851753\H,-2.1532  
421819,3.7682446126,0.0009989222\H,-2.5192185271,-1.1726783582,0.00091  
69462\H,-4.5658200637,0.2483693626,0.0003010538\H,-0.098905648,-1.3906  
893643,0.0016373739\H,4.4783786617,-0.3160145622,0.0029917834\H,-0.480  
2221416,4.4337419444,0.0014924874\H,1.0334765552,4.1880073007,-0.88036  
61821\H,1.0329521621,4.1880168656,0.8842533188\H,-4.3758188587,3.73932  
58137,0.0003385944\Version=ES64L-G09RevD.01\State=1-A'\HF=-852.856439  
1\RMSD=6.844e-09\RMSF=4.570e-05\Dipole=-5.0474081,1.5024256,-0.0015081  
\Quadrupole=-13.3454295,8.2299205,5.115509,-10.4871945,-0.0054292,-0.0  
031334\PG=CS [SG(C12H7N3O3),X(H2)]\@
```

### F<sub>420</sub> Deprotonated Aqueous Optimisation

```
1\1\GINC-R997\FOpt\RM06L\6-311+G(2d,p)\C12H8N3O3(1-)\ROOT\08-Dec-2014\  
0\#\#M06L/6-311+g(2d,p) OPT SCRF=(SMD,Solvent=Water,Read) maxdisk=2147  
483648\F2D1solv.m06.m06l\0,1\C,-3.4757895176,2.1120359675,0.0004414
```

066\C,-2.1703729989,2.6856351606,0.0008136005\C,-1.0244830362,1.911970  
 2134,0.0013635996\C,-1.1461497673,0.4809201453,0.0014635225\C,-2.44605  
 107,-0.092633609,0.0011019631\C,-3.565481752,0.6726312817,0.0006241389  
 \N,0.2645945855,2.455944208,0.0017737244\C,1.3986533796,1.6751490482,0  
 .0020464197\C,1.250884567,0.2656292507,0.0021195601\C,-0.0085623198,-0  
 .3038497282,0.0018513714\N,2.5686055545,2.314088842,0.0023321858\C,3.6  
 995851065,1.5742465383,0.0028488688\N,3.6097452552,0.1819679911,0.0027  
 604161\C,2.4443635578,-0.5449929454,0.0024543116\C,0.4721904341,3.9035  
 890826,0.0019522899\O,4.8325827626,2.0795524158,0.0027195578\O,2.46511  
 58026,-1.7820774179,0.0025103755\O,-4.5219003449,2.8358515675,-0.00005  
 71728\H,-2.1355497762,3.7659702536,0.000609667\H,-2.5107625152,-1.1771  
 241775,0.0012092216\H,-4.5536177866,0.2236113016,0.0003436207\H,-0.101  
 1692541,-1.3861340236,0.0019095288\H,4.4833500258,-0.3319208081,0.0029  
 481211\H,-0.4763170882,4.4213633809,0.0030415932\H,1.0335171374,4.2004  
 937553,-0.8823574292\H,1.0352190591,4.1998823059,0.8853655374\\Version  
 =ES64L-G09RevD.01\State=1-A\HF=-852.3927678\RMSD=2.619e-09\RMSF=7.188e  
 -05\Dipole=0.4330014,-0.9793488,0.0011745\Quadrupole=-48.5674215,17.56  
 07902,31.0066314,13.1682689,-0.0234294,0.0071216\PG=C01 [X(C12H8N3O3)]  
 \\\@

#### F<sub>420</sub> Deprotonated Low Polarity Optimisation

1\1\GINC-R228\FOpt\RM06L\6-311+G(2d,p)\C12H8N3O3(1-)\ROOT\19-Mar-2015\  
 0\\#M06L/6-311+g(2d,p) OPT IOP(2/17=4) Freq=noraman SCRF=(SMD,Solvent=  
 Ethanol,read) maxdisk=1610612736\F2D1solvE.freq\\-1,1\C,-3.4834018886  
 ,2.1157651609,0.0006486166\C,-2.1721016539,2.6862282031,0.0010029003\C  
 ,-1.0278240294,1.9119515054,0.001377223\C,-1.1487926527,0.4792198472,0  
 .0013968894\C,-2.450647995,-0.0920995684,0.0010485113\C,-3.5694985414,  
 0.6731419287,0.0006931745\N,0.2624189783,2.4527351561,0.0017338272\C,1  
 .3970751116,1.671830081,0.002060792\C,1.2499762494,0.2612553818,0.0020  
 661224\C,-0.0111630361,-0.3058938554,0.0017440045\N,2.5615278662,2.315  
 0660173,0.0023572588\C,3.7010556785,1.5842155909,0.0026644181\N,3.6095  
 330713,0.1896182551,0.0026925542\C,2.4476967437,-0.5465806185,0.002431  
 4823\C,0.4783777084,3.897022836,0.0017883642\O,4.82819766,2.0913039342  
 ,0.0030442564\O,2.4755965014,-1.7804288011,0.0025072129\O,-4.522732590  
 7,2.8350793997,0.00030795\H,-2.1366389043,3.7670927804,0.0009513134\H,  
 -2.5174738122,-1.1771328592,0.0010744107\H,-4.5584742782,0.224889101,0  
 .0004282293\H,-0.1035154349,-1.3888125364,0.0017589018\H,4.4841310873,  
 -0.3225523303,0.0029905763\H,-0.4669026859,4.4219111513,0.0017450931\H  
 ,1.0479500678,4.1885245237,-0.8802999926\H,1.0478307792,4.1884497155,0  
 .8839759101\\Version=ES64L-G09RevD.01\State=1-A\HF=-852.388667\RMSD=6.  
 638e-09\RMSF=6.753e-05\Dipole=0.3708087,-0.8645618,0.0001522\Quadrupol  
 e=-46.173067,16.4120463,29.7610206,12.3772166,-0.022694,0.0043009\PG=C  
 01 [X(C12H8N3O3)]\\@

#### F<sub>420</sub>H<sub>2</sub> Aqueous Optimisation

1\1\GINC-R3398\FOpt\RwB97XD\6-311+G(2d,p)\C12H11N3O3\ROOT\29-Apr-2015\  
 0\\#wB97XD/6-311+g(2d,p) OPT SCRF=(SMD,Solvent=Water,Read) maxdisk=268  
 4354560\F1H2solv.w\\0,1\C,-3.3357096141,2.1115050812,-0.3490105802\C,  
 -2.0849967663,2.6777417754,-0.141376199\C,-0.9987614785,1.8587572767,0  
 .1535440278\C,-1.1551763713,0.4732777649,0.2261097095\C,-2.4116402074,  
 -0.0621249272,-0.0162360114\C,-3.5087451749,0.7365423026,-0.2949318151  
 \N,0.2846263402,2.4252699173,0.3516160296\C,1.3684930652,1.631897416,0  
 .116638755\C,1.2962173398,0.2659411716,0.1677436708\C,0.0192534624,-0.  
 3937909518,0.5909368657\N,2.5545966879,2.2509401511,-0.1903198578\C,3.  
 7132944138,1.5759886436,-0.4620595783\N,3.6144668423,0.2215889565,-0.4

034261362\C,2.4611467677,-0.4995843467,-0.0999850079\C,0.4200291098,3.8700791776,0.4867279213\O,4.7526394613,2.1616564982,-0.7430640201\O,2.5311034893,-1.7343457207,-0.0679507453\O,-4.4336865623,2.8815983113,-0.6279431751\H,-1.9768261693,3.7506856785,-0.2304381666\H,-2.5353994559,-1.1388142122,0.0282948871\H,-4.4871943205,0.3068434175,-0.470367029\H,-0.0736264611,-1.3701314123,0.1131634723\H,4.4590987602,-0.3052822522,-0.5854532336\H,-0.3933865319,4.2424108666,1.1051076674\H,0.4020542903,4.3811721991,-0.4790061849\H,1.3429310927,4.1080646484,1.0120446019\H,-4.1947543695,3.8149628588,-0.6136866826\H,0.0279577802,-0.5758980322,1.6733531739\H,2.6046545802,3.2524477423,-0.3116063595\\Version=ES64L-G09RevD.01\State=1-A\HF=-853.8914107\RMSD=7.594e-09\RMSF=2.711e-05\Dipole=-1.8212769,3.5828827,0.5992011\Quadrupole=-15.786752,10.7521698,5.0345822,0.0205398,2.323926,1.4911068\PG=C01 [X(C12H11N3O3)]\@

#### **F<sub>420</sub>H<sub>2</sub> Low Polarity Optimisation**

1\1\GINC-R531\FOpt\RM06L\6-311+G(2d,p)\C12H11N3O3\ROOT\03-May-2015\0\#\M06L/6-311+g(2d,p) OPT SCRF=(SMD,Solvent=Ethanol,Read) maxdisk=2684354560\F1H2solvt.m061\0,1\C,-3.3625683783,2.120066324,-0.3048701752\C,-2.1027888786,2.6842813299,-0.1330598073\C,-1.0039842403,1.8640597881,0.123913764\C,-1.1565660053,0.4739787855,0.1957576316\C,-2.4253972378,-0.0551283081,-0.003623373\C,-3.5321797135,0.7427308532,-0.2444020754\N,0.2812296534,2.4340346732,0.2848585774\C,1.37398723,1.6337960169,0.0899317124\C,1.2997935992,0.2650604746,0.1403849703\C,0.0179139654,-0.4040209674,0.5095494989\N,2.5744450152,2.2525384997,-0.1680684686\C,3.7534395619,1.5803136189,-0.4062619916\N,3.6409563903,0.2233063178,-0.3427202704\C,2.4722948617,-0.5072407922,-0.0784838548\C,0.4207704963,3.8731726587,0.4271465024\O,4.7957472315,2.1698945464,-0.6556251574\O,2.5401419013,-1.7395866431,-0.0364782961\O,-4.4661734621,2.8814813209,-0.5524811315\H,-1.9939141972,3.7583331906,-0.2249027164\H,-2.5494715223,-1.1335213955,0.045932854\H,-4.5178353701,0.3142966473,-0.388511536\H,-0.0689052879,-1.3576335286,-0.0197428956\H,4.489707082,-0.3080125576,-0.4947585343\H,-0.3870605317,4.2507068856,1.0516455102\H,0.399700809,4.3967827675,-0.5343028521\H,1.3495395966,4.1071382836,0.945923813\H,-4.2229800073,3.8161491427,-0.5603522624\H,0.0196118973,-0.669999301,1.5783245761\H,2.6232055409,3.2524213683,-0.3063040121\\Version=ES64L-G09RevD.01\State=1-A\HF=-854.0557788\RMSD=6.977e-09\RMSF=1.665e-05\Dipole=-1.7625005,3.3487579,0.4386554\Quadrupole=-14.4945666,9.6095167,4.8850499,-0.8811483,2.0114442,1.166726\PG=C01 [X(C12H11N3O3)]\@

#### **F<sub>420</sub>H<sub>2</sub> Deprotonated Aqueous Optimisation**

1\1\GINC-R423\FOpt\RwB97XD\6-311+G(2d,p)\C12H10N3O3(1-)\ROOT\29-Apr-2015\0\#\wB97XD/6-311+g(2d,p) OPT SCRF=(SMD,Solvent=Water,Read) maxdisk=2684354560\F2H2D1solv.w\0,1\C,-3.329846199,2.1079948102,-0.3503140021\C,-2.0801731757,2.6727234119,-0.1304105108\C,-0.9890161174,1.8558133565,0.1679056201\C,-1.1573008243,0.4676538261,0.2342798234\C,-2.4116463594,-0.0651026104,-0.0175378643\C,-3.5086382633,0.7345823511,-0.3031831412\N,0.2852312754,2.4125622688,0.3869630193\C,1.4056953773,1.6375106729,0.1131814419\C,1.2912597078,0.2545811737,0.1641794573\C,0.0156788447,-0.3925657869,0.6116838783\N,2.5331818185,2.3091857696,-0.1804795188\C,3.6361225417,1.600116417,-0.4529161301\N,3.564735246,0.2242069592,-0.4471097329\C,2.435725514,-0.5079048526,-0.130166114\C,0.409789846,3.8585767173,0.4515962768\O,4.7367600569,2.1321499944,-0.7310441069\O,2.5149199794,-1.7603552436,-0.1179702034\O,-4.4250584524,2.8852473066,-0.6346791511\H,-1.9757041729,3.7466702988,-0.2103676898\H,-2.5367589313,-1.1420778436,0.0251039534\H,-4.4865115199,0.3068007904,-0.4868155

268\H,-0.0874583334,-1.3830683325,0.1647188498\H,4.4122535459,-0.28896  
 19134,-0.6474421183\H,-0.362961212,4.2537710433,1.1099767687\H,0.32065  
 35015,4.3315703722,-0.5313396462\H,1.3759276805,4.1157871919,0.8716866  
 216\H,-4.1786847938,3.8165053284,-0.6178540758\H,0.0236334193,-0.54569  
 3477,1.7003838214\\Version=ES64L-G09RevD.01\State=1-A\HF=-853.422114\R  
 MSD=8.110e-09\RMSF=1.082e-05\Dipole=-5.8006138,1.9459168,0.8961631\Qua  
 drupole=-29.2469923,11.0232446,18.2237477,-6.5247616,4.8186671,1.87111  
 98\PG=C01 [X(C12H10N3O3)]\\@

#### F<sub>420</sub>H<sub>2</sub> Deprotonated Low Polarity Optimisation

1\1\GINC-R595\FOpt\RM06L\6-311+G(2d,p)\C12H10N3O3(1-)\ROOT\03-May-2015  
 \0\#\M06L/6-311+g(2d,p) OPT SCRF=(SMD,Solvent=Ethanol,Read) maxdisk=26  
 84354560\F2H2D1solV.E.freq\\-1,1\C,3.7173424403,-0.2193706703,-0.29916  
 57095\C,2.5682742137,-0.975366326,-0.0963772185\C,1.340322384,-0.34429  
 37201,0.1358502099\C,1.2740286174,1.0593477441,0.1572133484\C,2.438248  
 3534,1.7794810426,-0.0701068575\C,3.664338974,1.1675572623,-0.29244272  
 84\N,0.1789123217,-1.102895563,0.3310362443\C,-1.0740233251,-0.5241585  
 867,0.1046074596\C,-1.1843866567,0.8613602788,0.1155583372\C,-0.026485  
 3692,1.7387800056,0.4608851715\N,-2.0803293962,-1.3890013454,-0.111398  
 4124\C,-3.3107882617,-0.8878906275,-0.333958258\N,-3.4643855626,0.4906  
 742169,-0.3581174321\C,-2.4580122851,1.4210614543,-0.1226953003\C,0.29  
 45743471,-2.54346022,0.4328053972\O,-4.3152928286,-1.6020756619,-0.528  
 1421909\O,-2.7405122306,2.6398080085,-0.1257751301\O,4.9320571849,-0.8  
 060179111,-0.5264439402\H,2.6413764814,-2.0554566219,-0.1427111866\H,2  
 .3837573951,2.8652808548,-0.0584645222\H,4.5664169449,1.7456880982,-0.  
 4602086898\H,-0.093943266,2.6869855347,-0.0833632031\H,-4.3971286854,0  
 .8509623025,-0.5156560658\H,1.0910277508,-2.7970208165,1.1344222428\H,  
 0.5115689315,-3.0185674239,-0.5314877646\H,-0.6405131752,-2.9488408716  
 ,0.805111307\H,4.8339493788,-1.7663006805,-0.5017347745\H,-0.056794676  
 4,2.0251412428,1.5263806668\\Version=ES64L-G09RevD.01\State=1-A\HF=-85  
 3.5792612\RMSD=8.954e-09\RMSF=1.788e-05\Dipole=5.6122031,-0.9415771,0.  
 6351711\Quadrupole=-25.4007124,6.8030137,18.5976987,-12.4249406,-2.983  
 9231,-1.754964\PG=C01 [X(C12H10N3O3)]\\@

#### F<sub>420</sub> Aqueous TD-DFT

1\1\GINC-R38\SP\RwB97XD TD-FC\6-311+G(2d,p)\C12H9N3O3\ROOT\19-Nov-2015  
 \0\#\wB97XD td=(singlet,nstates=9)/6-311+g(2d,p) SCRF=(SMD,Solvent=Wa  
 ter) maxdisk=2684354560\\f420 in water\\0,1\C,0,-3.4318763492,2.076872  
 3471,0.0006281174\C,0,-2.1894817555,2.6881775133,0.0009940072\C,0,-1.0  
 278685728,1.903981555,0.0013434552\C,0,-1.1585237139,0.491228674,0.001  
 3122859\C,0,-2.4447511274,-0.0946937513,0.0009332327\C,0,-3.5707645254  
 ,0.6727700342,0.0005944547\N,0,0.24376602,2.459368662,0.0017183373\C,0  
 ,1.3743141704,1.6896056738,0.0020584754\C,0,1.2320239431,0.2686501562,  
 0.002023893\C,0,-0.0021530188,-0.3054503114,0.0016602436\N,0,2.5392079  
 123,2.3161658408,0.0024012515\C,0,3.680177598,1.5746257168,0.002744333  
 6\N,0,3.6031955893,0.183183494,0.0027289989\C,0,2.452359607,-0.5439682  
 184,0.0023909456\C,0,0.4565325382,3.9136524933,0.0017736825\O,0,4.7950  
 710828,2.0929867957,0.0030728375\O,0,2.4555187249,-1.7688406298,0.0023  
 985236\O,0,-4.5695753454,2.7866476832,0.0002861795\H,0,-2.1672715702,3  
 .776255372,0.0009947097\H,0,-2.5114359563,-1.1809949341,0.0009193041\H  
 ,0,-4.5705471522,0.237791337,0.0002997063\H,0,-0.0954761542,-1.3914996  
 231,0.0016383975\H,0,4.5323684832,-0.3503565861,0.0030080138\H,0,-0.49  
 32773736,4.4383800841,0.0014885827\H,0,1.0294859015,4.1881727942,-0.88  
 75695278\H,0,1.0289572278,4.1881824372,0.8914542896\H,0,-4.3714528619,  
 3.7735733269,0.0003397062\\Version=ES64L-G09RevD.01\State=1-A'\HF=-852



.6754498\RMSD=4.654e-09\PG=CS [SG(C12H7N3O3),X(H2)]\ \@

#### F<sub>420</sub> Low Polarity TD-DFT

1\1\GINC-R39\SP\RwB97XD TD-FC\6-311+G(2d,p)\C12H9N3O3\ROOT\19-Nov-2015  
\0\#\ wB97XD td=(singlet,nstates=9)/6-311+g(2d,p) SCRF=(SMD,Solvent=Et  
hanol,read) maxdisk=2684354560\\f420 in d12\\0,1\C,0,-3.4318763492,2.0  
768723471,0.0006281174\C,0,-2.1894817555,2.6881775133,0.0009940072\C,0  
, -1.0278685728,1.903981555,0.0013434552\C,0,-1.1585237139,0.491228674,  
0.0013122859\C,0,-2.4447511274,-0.0946937513,0.0009332327\C,0,-3.57076  
45254,0.6727700342,0.0005944547\N,0,0.24376602,2.459368662,0.001718337  
3\C,0,1.3743141704,1.6896056738,0.0020584754\C,0,1.2320239431,0.268650  
1562,0.002023893\C,0,-0.0021530188,-0.3054503114,0.0016602436\N,0,2.53  
92079123,2.3161658408,0.0024012515\C,0,3.680177598,1.5746257168,0.0027  
443336\N,0,3.6031955893,0.183183494,0.0027289989\C,0,2.452359607,-0.54  
39682184,0.0023909456\C,0,0.4565325382,3.9136524933,0.0017736825\O,0,4  
.7950710828,2.0929867957,0.0030728375\O,0,2.4555187249,-1.7688406298,0  
.0023985236\O,0,-4.5695753454,2.7866476832,0.0002861795\H,0,-2.1672715  
702,3.776255372,0.0009947097\H,0,-2.5114359563,-1.1809949341,0.0009193  
041\H,0,-4.5705471522,0.237791337,0.0002997063\H,0,-0.0954761542,-1.39  
14996231,0.0016383975\H,0,4.5323684832,-0.3503565861,0.0030080138\H,0,  
-0.4932773736,4.4383800841,0.0014885827\H,0,1.0294859015,4.1881727942,  
-0.8875695278\H,0,1.0289572278,4.1881824372,0.8914542896\H,0,-4.371452  
8619,3.7735733269,0.0003397062\\Version=ES64L-G09RevD.01\State=1-A'\HF  
=-852.6766205\RMSD=3.714e-09\PG=CS [SG(C12H7N3O3),X(H2)]\ \@

#### F<sub>420</sub> Deprotonated Aqueous TD-DFT

1\1\GINC-R38\SP\RwB97XD TD-FC\6-311+G(2d,p)\C12H8N3O3(1-)\ROOT\20-Nov-  
2015\0\#\ wB97XD td=(singlet,nstates=9)/6-311+g(2d,p) SCRF=(SMD,Solven  
t=Water) maxdisk=2684354560\\deprotonated f420 in water\\-1,1\C,0,-3.4  
999792008,2.1208174246,0.0005494885\C,0,-2.1728197183,2.6908251736,0.0  
09239217\C,0,-1.0343478211,1.9182721608,0.0013801533\C,0,-1.151306768  
4,0.4820706457,0.001447161\C,0,-2.4597828482,-0.0937917008,0.001091320  
8\C,0,-3.5773318545,0.6614687961,0.0006752643\N,0,0.2611474768,2.45147  
10336,0.0017743287\C,0,1.4010692579,1.6750961284,0.0020829017\C,0,1.24  
96620693,0.2647641312,0.002106291\C,0,-0.0140695837,-0.2969155554,0.00  
18076823\N,0,2.5540389564,2.3228578436,0.0023541055\C,0,3.7080082369,1  
.5976610558,0.0027419486\N,0,3.6064966541,0.1930463754,0.0026935131\C,  
0,2.4486704663,-0.552167117,0.0024347267\C,0,0.4894151222,3.8934942027  
,0.0018797186\O,0,4.8255535927,2.0860535207,0.0028299136\O,0,2.4766476  
32,-1.7752617437,0.0024542793\O,0,-4.5222277396,2.8220118972,0.0001318  
136\H,0,-2.1594116274,3.7686213516,0.0007831428\H,0,-2.5205605248,-1.1  
779496476,0.0011608939\H,0,-4.5680212788,0.2233873572,0.0004007518\H,0  
, -0.0901524389,-1.3798614769,0.0018428826\H,0,4.4811864545,-0.31141064  
67,0.0028961984\H,0,-0.453883043,4.4192219512,0.0020080675\H,0,1.07204  
28332,4.1691045607,-0.8757440253\H,0,1.0721556952,4.1689122782,0.87948  
35561\\Version=ES64L-G09RevD.01\State=1-A'\HF=-852.2117468\RMSD=8.645e-  
09\PG=C01 [X(C12H8N3O3)]\ \@

#### F<sub>420</sub> Deprotonated Low Polarity TD-DFT

1\1\GINC-R39\SP\RwB97XD TD-FC\6-311+G(2d,p)\C12H8N3O3(1-)\ROOT\20-Nov-  
2015\0\#\ wB97XD td=(singlet,nstates=9)/6-311+g(2d,p) SCRF=(SMD,Solven  
t=Ethanol,read) maxdisk=2684354560\\deprotonated f420 in d12\\-1,1\C,0  
, -3.4999792008,2.1208174246,0.0005494885\C,0,-2.1728197183,2.690825173  
6,0.0009239217\C,0,-1.0343478211,1.9182721608,0.0013801533\C,0,-1.1513

067684,0.4820706457,0.001447161\C,0,-2.4597828482,-0.0937917008,0.0010  
913208\C,0,-3.5773318545,0.6614687961,0.0006752643\N,0,0.2611474768,2.  
4514710336,0.0017743287\C,0,1.4010692579,1.6750961284,0.0020829017\C,0  
,1.2496620693,0.2647641312,0.002106291\C,0,-0.0140695837,-0.2969155554  
,0.0018076823\N,0,2.5540389564,2.3228578436,0.0023541055\C,0,3.7080082  
369,1.5976610558,0.0027419486\N,0,3.6064966541,0.1930463754,0.00269351  
31\C,0,2.4486704663,-0.552167117,0.0024347267\C,0,0.4894151222,3.89349  
42027,0.0018797186\O,0,4.8255535927,2.0860535207,0.0028299136\O,0,2.47  
6647632,-1.7752617437,0.0024542793\O,0,-4.5222277396,2.8220118972,0.00  
01318136\H,0,-2.1594116274,3.7686213516,0.0007831428\H,0,-2.5205605248  
, -1.1779496476,0.0011608939\H,0,-4.5680212788,0.2233873572,0.000400751  
8\H,0,-0.0901524389,-1.3798614769,0.0018428826\H,0,4.4811864545,-0.311  
4106467,0.0028961984\H,0,-0.453883043,4.4192219512,0.0020080675\H,0,1.  
0720428332,4.1691045607,-0.8757440253\H,0,1.0721556952,4.1689122782,0.  
8794835561\\Version=ES64L-G09RevD.01\State=1-A\HF=-852.2082774\RMSD=7.  
980e-09\PG=C01 [X(C12H8N3O3)]\\@

#### F<sub>420</sub>H<sub>2</sub> Low Polarity TD-DFT

1\1\GINC-R1555\SP\RwB97XD TD-FC\6-311+G(2d,p)\C12H11N3O3\ROOT\04-May-2  
015\0\#\ wB97XD td=(singlet,nstates=9)/6-311+g(2d,p) SCRF=(SMD,Solvent  
=Ethanol,read) maxdisk=2684354560\F1H2solve.SMD.gsg\_ese.w\0,1\C,0,-3  
.3625683783,2.120066324,-0.3048701752\C,0,-2.1027888786,2.6842813299,-  
0.1330598073\C,0,-1.0039842403,1.8640597881,0.123913764\C,0,-1.1565660  
053,0.4739787855,0.1957576316\C,0,-2.4253972378,-0.0551283081,-0.00362  
3373\C,0,-3.5321797135,0.7427308532,-0.2444020754\N,0,0.2812296534,2.4  
340346732,0.2848585774\C,0,1.37398723,1.6337960169,0.0899317124\C,0,1.  
2997935992,0.2650604746,0.1403849703\C,0,0.0179139654,-0.4040209674,0.  
5095494989\N,0,2.5744450152,2.2525384997,-0.1680684686\C,0,3.753439561  
9,1.5803136189,-0.4062619916\N,0,3.6409563903,0.2233063178,-0.34272027  
04\C,0,2.4722948617,-0.5072407922,-0.0784838548\C,0,0.4207704963,3.873  
1726587,0.4271465024\O,0,4.7957472315,2.1698945464,-0.6556251574\O,0,2  
.5401419013,-1.7395866431,-0.0364782961\O,0,-4.4661734621,2.8814813209  
, -0.5524811315\H,0,-1.9939141972,3.7583331906,-0.2249027164\H,0,-2.549  
4715223,-1.1335213955,0.045932854\H,0,-4.5178353701,0.3142966473,-0.38  
8511536\H,0,-0.0689052879,-1.3576335286,-0.0197428956\H,0,4.489707082,  
-0.3080125576,-0.4947585343\H,0,-0.3870605317,4.2507068856,1.051645510  
2\H,0,0.399700809,4.3967827675,-0.5343028521\H,0,1.3495395966,4.107138  
2836,0.945923813\H,0,-4.2229800073,3.8161491427,-0.5603522624\H,0,0.01  
96118973,-0.669999301,1.5783245761\H,0,2.6232055409,3.2524213683,-0.30  
63040121\\Version=ES64L-G09RevD.01\State=1-A\HF=-853.8939858\RMSD=6.62  
2e-09\PG=C01 [X(C12H11N3O3)]\\@

#### F<sub>420</sub>H<sub>2</sub> Aqueous TD-DFT

1\1\GINC-R730\SP\RwB97XD TD-FC\6-311+G(2d,p)\C12H11N3O3\ROOT\03-May-20  
15\0\#\ wB97XD td=(singlet,nstates=9)/6-311+g(2d,p) SCRF=(SMD,Solvent=  
Water) maxdisk=2684354560\F1H2solve.SMD.gsg\_ese.w\0,1\C,0,-3.33570961  
41,2.1115050812,-0.3490105802\C,0,-2.0849967663,2.6777417754,-0.141376  
199\C,0,-0.9987614785,1.8587572767,0.1535440278\C,0,-1.1551763713,0.47  
32777649,0.2261097095\C,0,-2.4116402074,-0.0621249272,-0.0162360114\C,  
0,-3.5087451749,0.7365423026,-0.2949318151\N,0,0.2846263402,2.42526991  
73,0.3516160296\C,0,1.3684930652,1.631897416,0.116638755\C,0,1.2962173  
398,0.2659411716,0.1677436708\C,0,0.0192534624,-0.3937909518,0.5909368  
657\N,0,2.5545966879,2.2509401511,-0.1903198578\C,0,3.7132944138,1.575  
9886436,-0.4620595783\N,0,3.6144668423,0.2215889565,-0.4034261362\C,0,  
2.4611467677,-0.4995843467,-0.0999850079\C,0,0.4200291098,3.8700791776

,0.4867279213\O,0,4.7526394613,2.1616564982,-0.7430640201\O,0,2.5311034893,-1.7343457207,-0.0679507453\O,0,-4.4336865623,2.8815983113,-0.6279431751\H,0,-1.9768261693,3.7506856785,-0.2304381666\H,0,-2.5353994559,-1.1388142122,0.0282948871\H,0,-4.4871943205,0.3068434175,-0.470367029\H,0,-0.0736264611,-1.3701314123,0.1131634723\H,0,4.4590987602,-0.3052822522,-0.5854532336\H,0,-0.3933865319,4.2424108666,1.1051076674\H,0,0.4020542903,4.3811721991,-0.4790061849\H,0,1.3429310927,4.1080646484,1.0120446019\H,0,-4.1947543695,3.8149628588,-0.6136866826\H,0,0.0279577802,-0.5758980322,1.6733531739\H,0,2.6046545802,3.2524477423,-0.3116063595\\Version=ES64L-G09RevD.01\State=1-A\HF=-853.8914107\RMSD=5.674e-09\PG=C01 [X(C12H11N3O3)]\\@

#### F<sub>420</sub>H<sub>2</sub> Deprotonated Low Polarity TD-DFT

1\1\GINC-R3588\SP\RwB97XD TD-FC\6-311+G(2d,p)\C12H10N3O3(1-)\ROOT\04-May-2015\0\\# wB97XD td=(singlet,nstates=9)/6-311+g(2d,p) SCRF=(SMD,Solvent=Ethanol,read) maxdisk=2684354560\F2H2D1solvE.SMD.gsg\_ese.w\\-1,1\C,0,3.7173424403,-0.2193706703,-0.2991657095\C,0,2.5682742137,-0.975366326,-0.0963772185\C,0,1.340322384,-0.3442937201,0.1358502099\C,0,1.2740286174,1.0593477441,0.1572133484\C,0,2.4382483534,1.7794810426,-0.0701068575\C,0,3.664338974,1.1675572623,-0.2924427284\N,0,0.1789123217,-1.102895563,0.3310362443\C,0,-1.0740233251,-0.5241585867,0.1046074596\C,0,-1.1843866567,0.8613602788,0.1155583372\C,0,-0.0264853692,1.7387800056,0.4608851715\N,0,-2.0803293962,-1.3890013454,-0.1113984124\C,0,-3.3107882617,-0.8878906275,-0.333958258\N,0,-3.4643855626,0.4906742169,-0.3581174321\C,0,-2.4580122851,1.4210614543,-0.1226953003\C,0,0.2945743471,-2.54346022,0.4328053972\O,0,-4.3152928286,-1.6020756619,-0.5281421909\O,0,-2.7405122306,2.6398080085,-0.1257751301\O,0,4.9320571849,-0.8060179111,-0.5264439402\H,0,2.6413764814,-2.0554566219,-0.1427111866\H,0,2.3837573951,2.8652808548,-0.0584645222\H,0,4.5664169449,1.7456880982,-0.4602086898\H,0,-0.093943266,2.6869855347,-0.0833632031\H,0,-4.3971286854,0.8509623025,-0.5156560658\H,0,1.0910277508,-2.7970208165,1.1344222428\H,0,0.5115689315,-3.0185674239,-0.5314877646\H,0,-0.6405131752,-2.9488408716,0.805111307\H,0,4.8339493788,-1.7663006805,-0.5017347745\H,0,-0.0567946764,2.0251412428,1.5263806668\\Version=ES64L-G09RevD.01\State=1-A\HF=-853.4165125\RMSD=7.450e-09\PG=C01 [X(C12H10N3O3)]\\@

#### F<sub>420</sub>H<sub>2</sub> Deprotonated Aqueous TD-DFT

1\1\GINC-R512\SP\RwB97XD TD-FC\6-311+G(2d,p)\C12H10N3O3(1-)\ROOT\03-May-2015\0\\# wB97XD td=(singlet,nstates=9)/6-311+g(2d,p) SCRF=(SMD,Solvent=Water) maxdisk=2684354560\F2H2D1solv.SMD.gsg\_ese.w\\-1,1\C,0,-3.329846199,2.1079948102,-0.3503140021\C,0,-2.0801731757,2.6727234119,-0.1304105108\C,0,-0.9890161174,1.8558133565,0.1679056201\C,0,-1.1573008243,0.4676538261,0.2342798234\C,0,-2.4116463594,-0.0651026104,-0.0175378643\C,0,-3.5086382633,0.7345823511,-0.3031831412\N,0,0.2852312754,2.4125622688,0.3869630193\C,0,1.4056953773,1.6375106729,0.1131814419\C,0,1.2912597078,0.2545811737,0.1641794573\C,0,0.0156788447,-0.3925657869,0.6116838783\N,0,2.5331818185,2.3091857696,-0.1804795188\C,0,3.6361225417,1.600116417,-0.4529161301\N,0,3.564735246,0.2242069592,-0.4471097329\C,0,2.435725514,-0.5079048526,-0.130166114\C,0,0.409789846,3.8585767173,0.4515962768\O,0,4.7367600569,2.1321499944,-0.7310441069\O,0,2.5149199794,-1.7603552436,-0.1179702034\O,0,-4.4250584524,2.8852473066,-0.6346791511\H,0,-1.9757041729,3.7466702988,-0.2103676898\H,0,-2.5367589313,-1.1420778436,0.0251039534\H,0,-4.4865115199,0.3068007904,-0.4868155268\H,0,-0.0874583334,-1.3830683325,0.1647188498\H,0,4.4122535459,-

0.2889619134,-0.6474421183\H,0,-0.362961212,4.2537710433,1.1099767687\  
H,0,0.3206535015,4.3315703722,-0.5313396462\H,0,1.3759276805,4.1157871  
919,0.8716866216\H,0,-4.1786847938,3.8165053284,-0.6178540758\H,0,0.02  
36334193,-0.545693477,1.7003838214\\Version=ES64L-G09RevD.01\State=1-A  
\HF=-853.422114\RMSD=7.822e-09\PG=C01 [X(C12H10N3O3)]\@
